# Supplementary material for: Tuning ethanol synthesis pathways from syngas: nanosheet-structured K-doped Co–MoS 2 catalysts and the role of CVD sulfidation
Source: Royal Society of Chemistry journal article supplement (doi:10.1039/d5cy00403a), 2025-01-01
Supplement: d5cy00403a1.pdf [file d5cy00403a1.pdf]

## Supplementary materials

### **Tuning Ethanol Synthesis Pathways from Syngas: Nanosheet-Structured K-Doped Co-MoS<sub>2</sub> Catalysts and the Role of CVD Sulfidation**

**Mohamed E. Osman,<sup>a\*</sup> Anton S. Konopatsky,<sup>b</sup> Nikita A. Repev,<sup>a, c</sup> Dmitry V. Shtansky,<sup>b</sup> Pavel A. Nikulshin,<sup>d</sup> Victor M. Kogan<sup>a</sup>**

<sup>a</sup> N.D. Zelinsky Institute of Organic Chemistry RAS, Moscow 119991, Russia

<sup>b</sup> National University of Science and Technology MISIS, 119049 Moscow, Russia

<sup>c</sup> Lomonosov Moscow State University, Moscow 119991, Russia

<sup>d</sup> RUDN University, 6 Miklukho-Maklaya St, Moscow, 117198, Russia

[\\*osman@ioc.ac.ru](mailto:*osman@ioc.ac.ru)

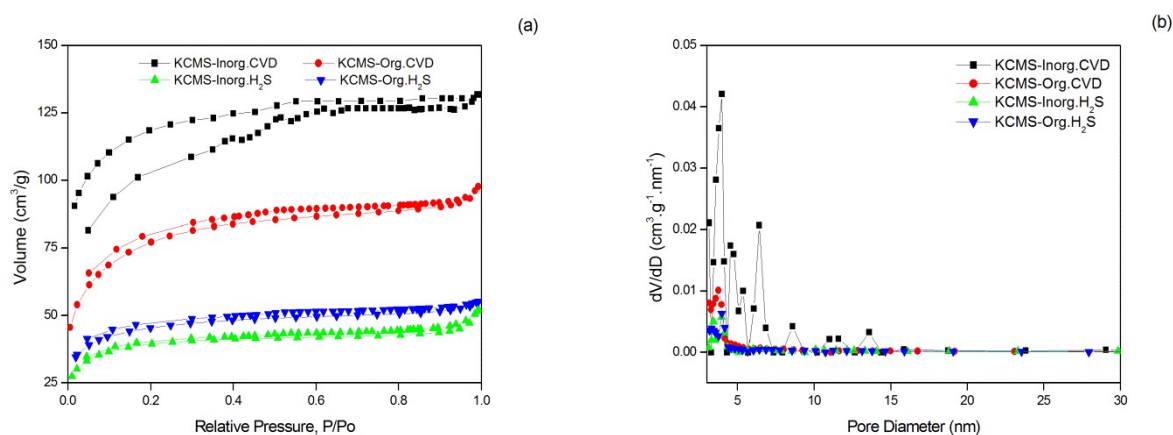

**Figure S1.** Textural characteristics of sulfided catalysts under study: **(a)** N<sub>2</sub>-adsorption isotherms; **(b)** Pore size distribution

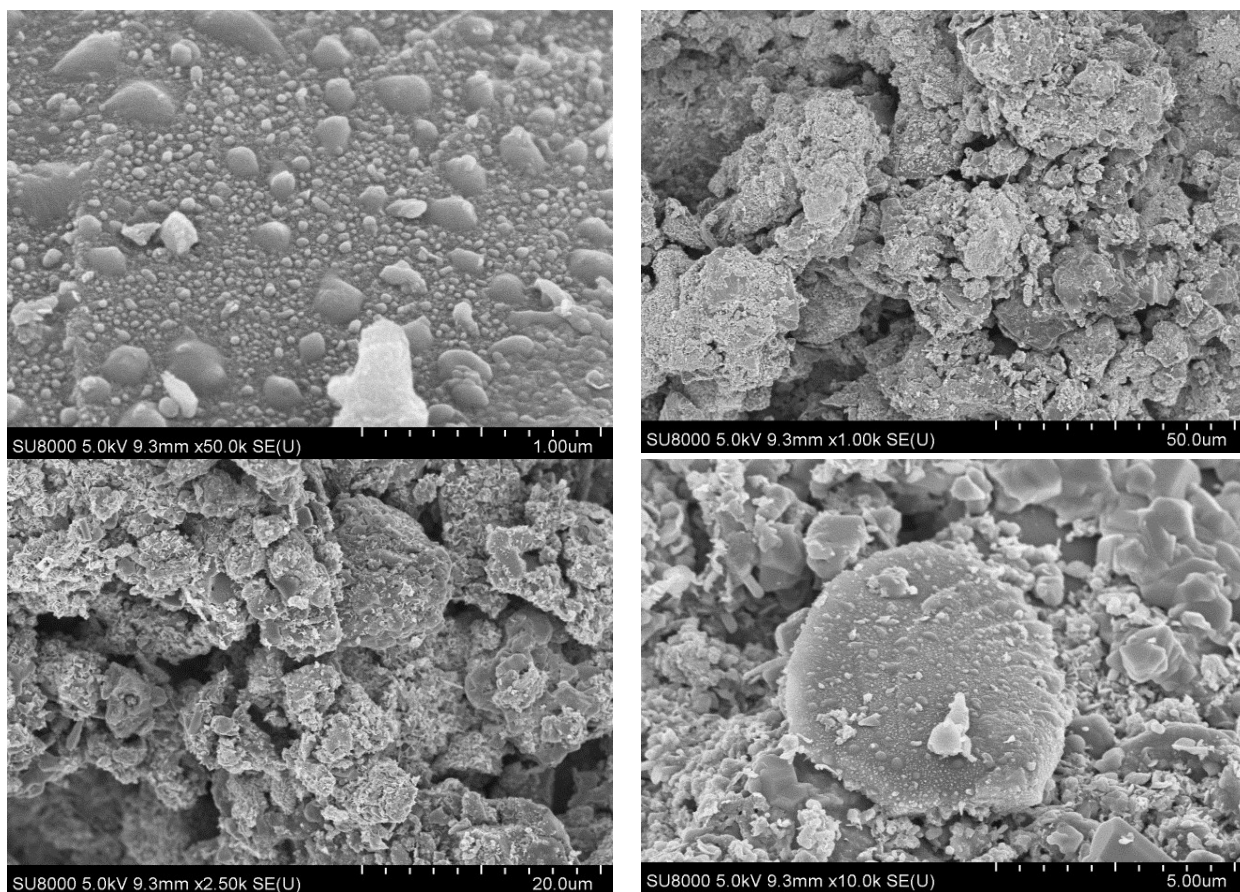

**Figure S2.** SEM micrographs of AJ-3 activated carbon support

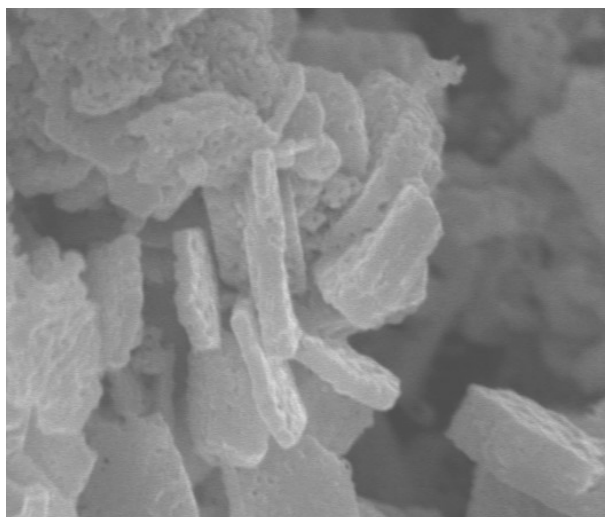

**Figure S3.** Additional SEM image of KCMS-Inorg.CVD

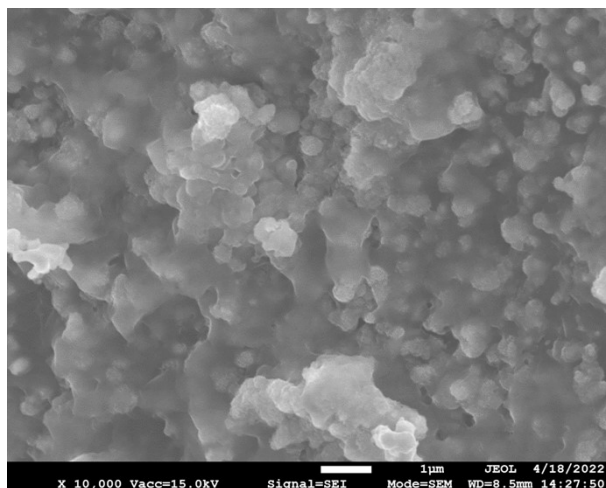

**Figure S4.** Additional SEM image of KCMS-org.CVD

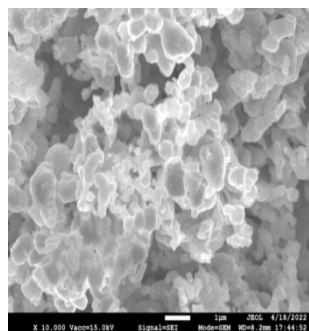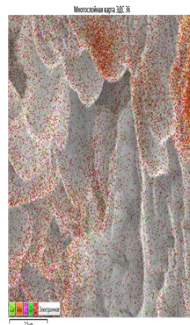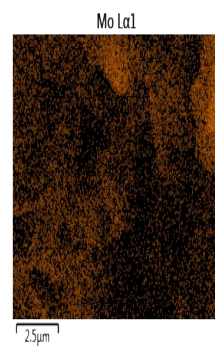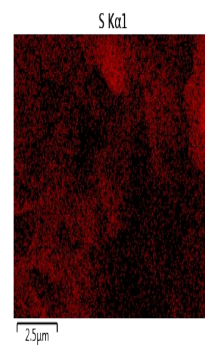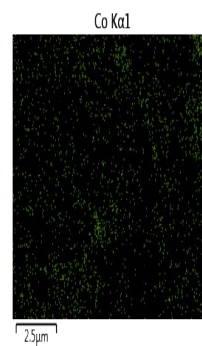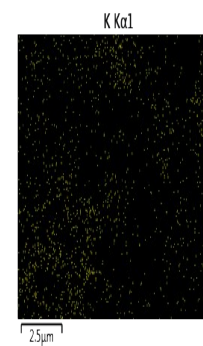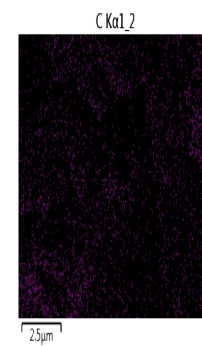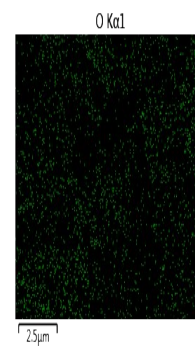

**a) KCMS-Inorg.CVD**

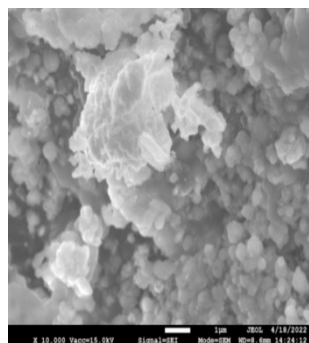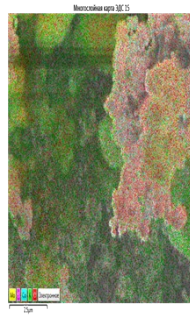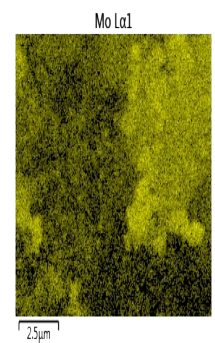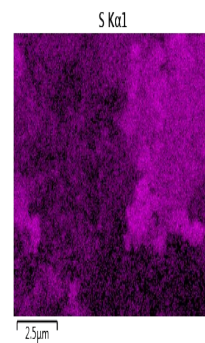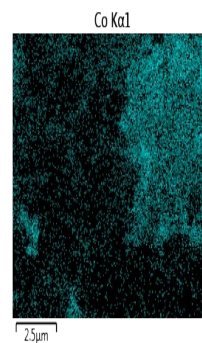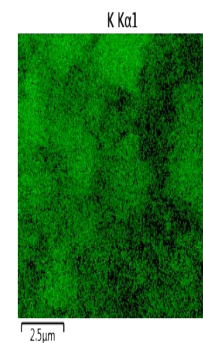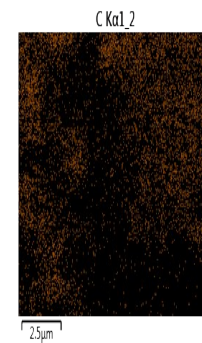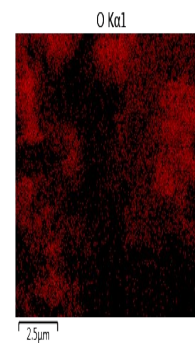

**b) KCMS-org.CVD**



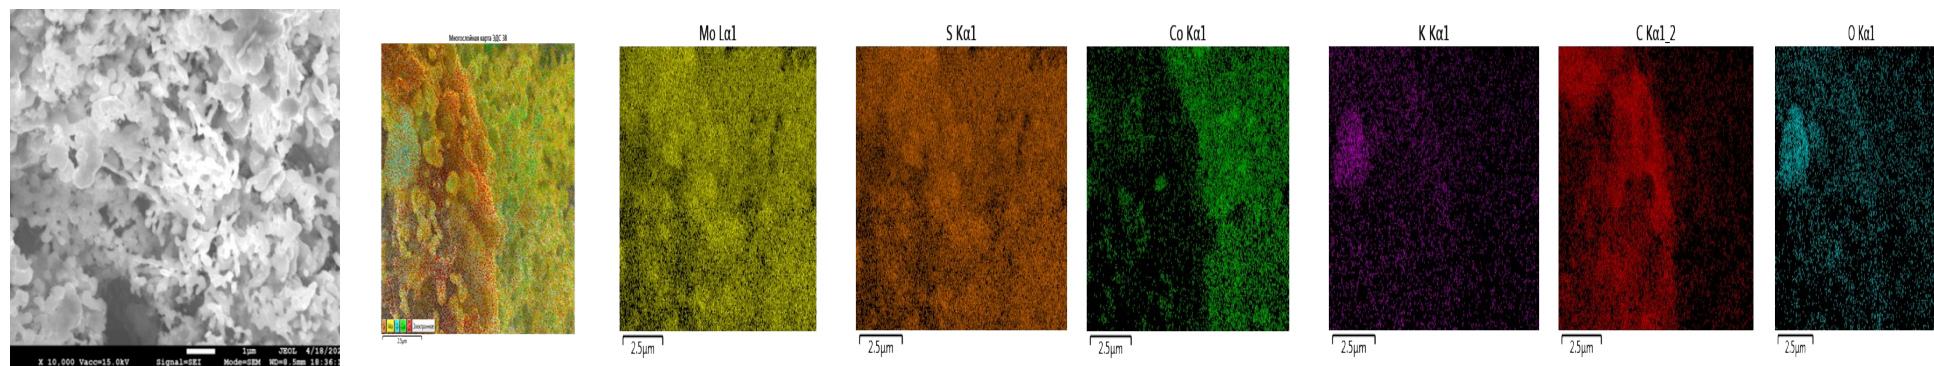

**c) KCMS-Inorg.H<sub>2</sub>S**

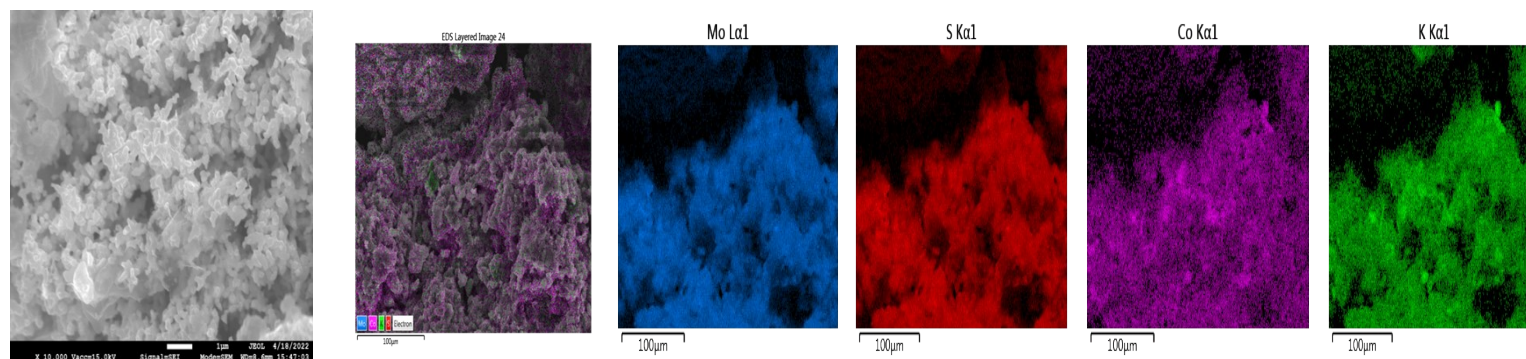

**d) KCMS-org.H<sub>2</sub>S**

**Figure S5. SEM/EDX of sulfided catalysts under study**

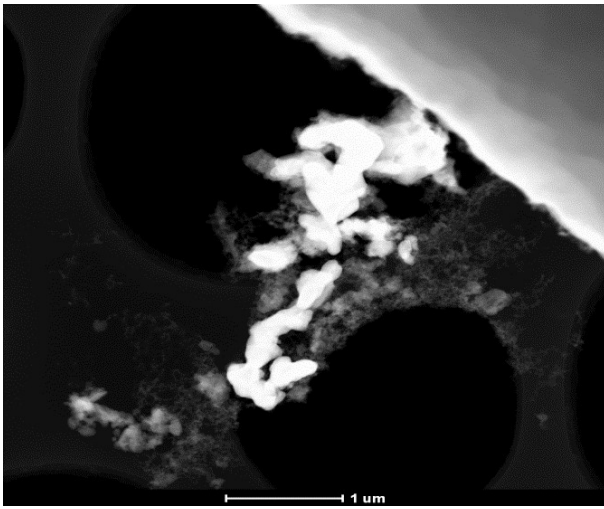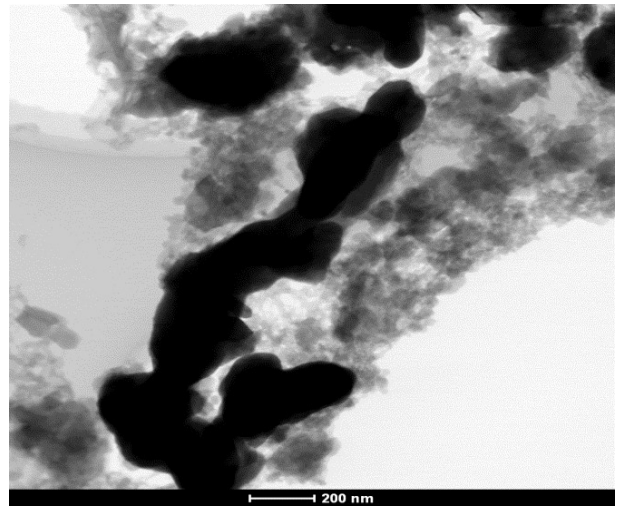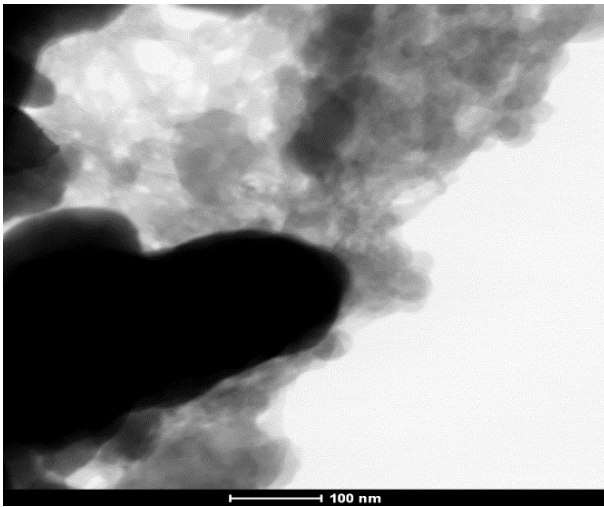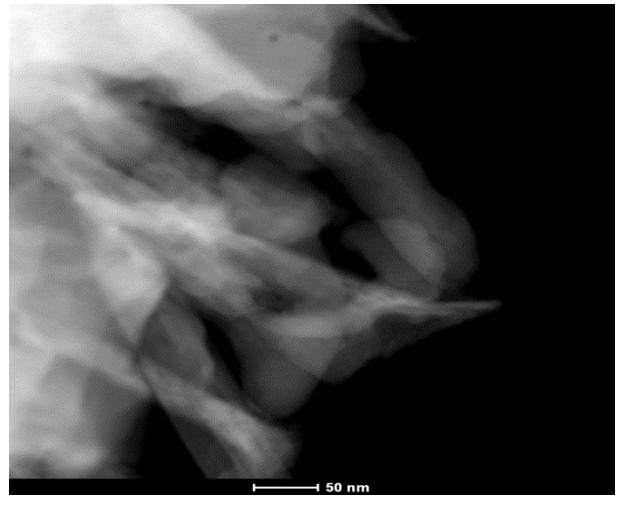

a) KCMS-Inorg.CVD

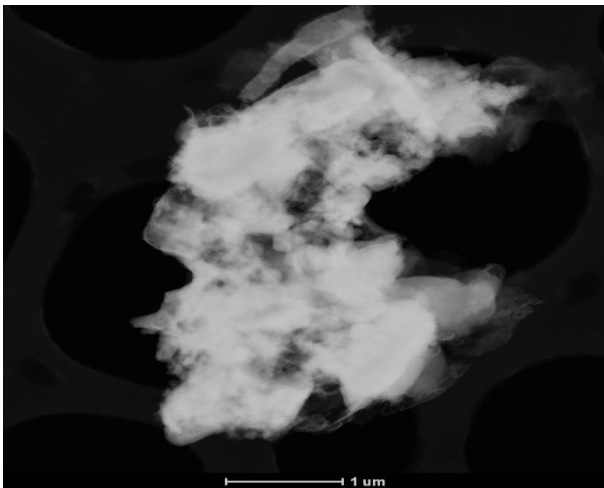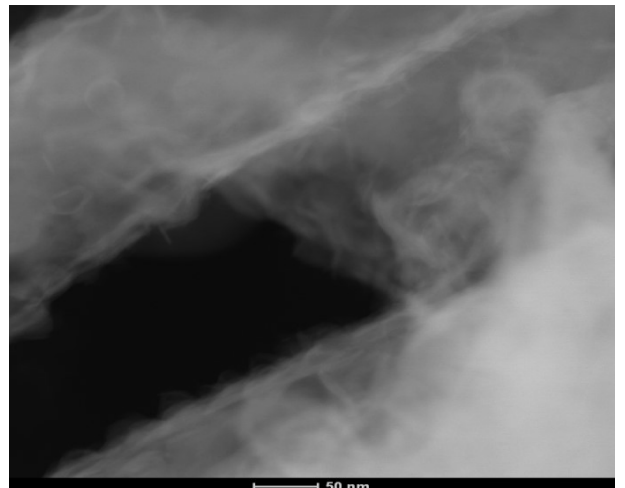

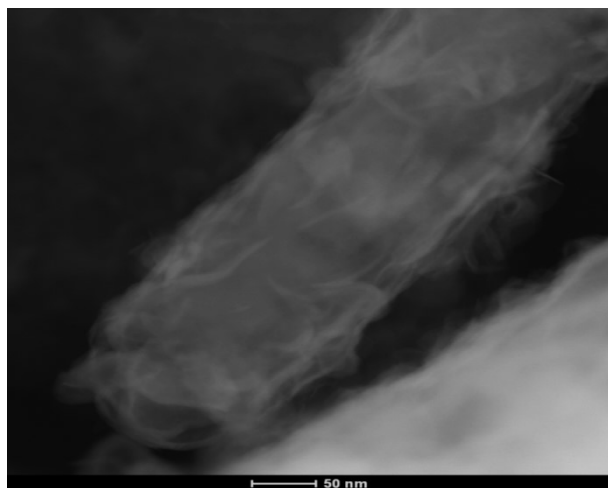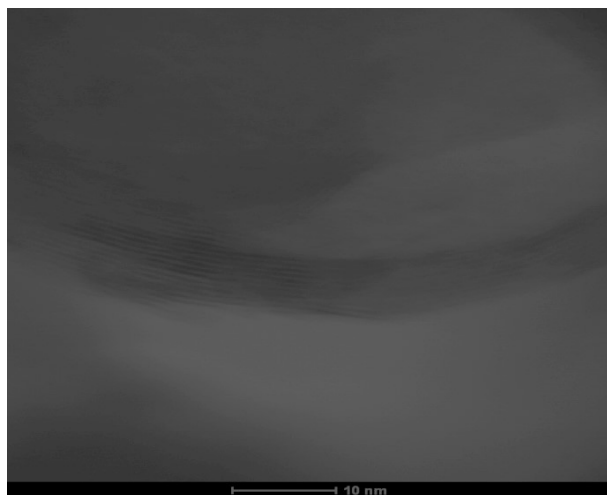

b) KCMS-Inorg.H<sub>2</sub>S

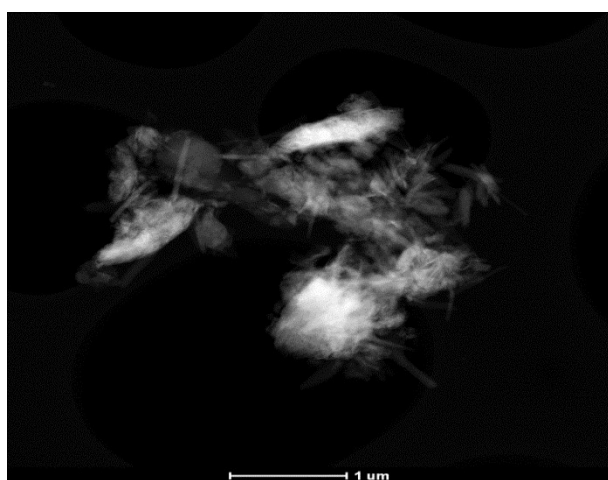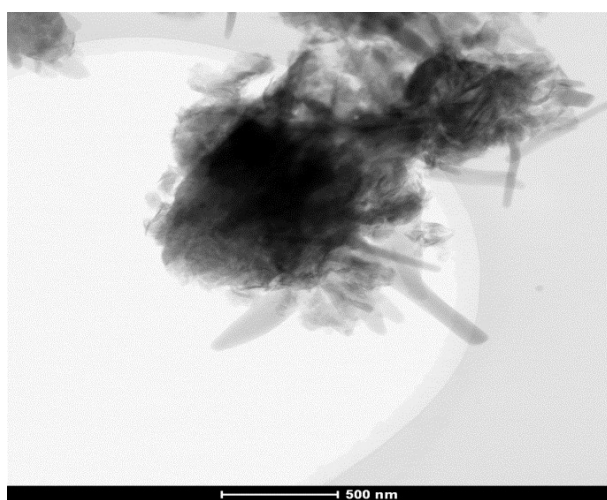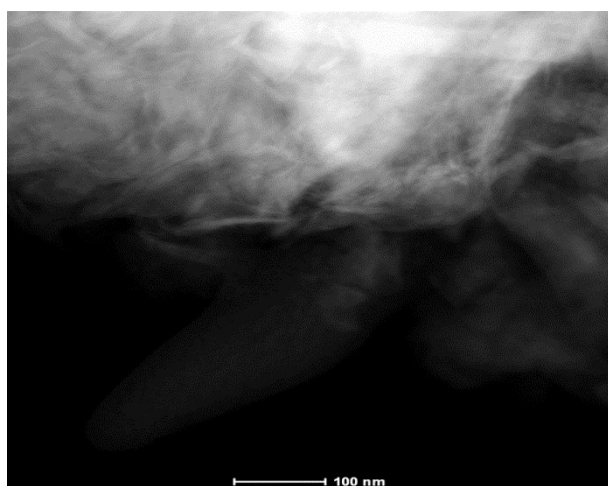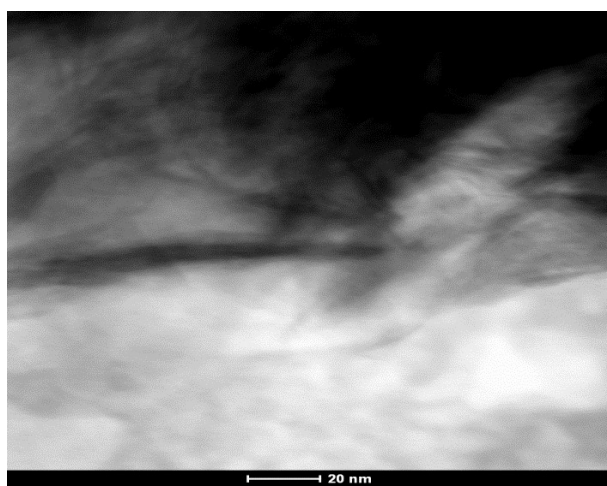

d) KCMS-org.H<sub>2</sub>S

**Figure S5.** STEM-HAADF images of the catalysts under study in low and high magnifications

**Table S1.** Product distribution selectivity (with CO<sub>2</sub>) over the catalysts under study. Reaction conditions: T = 360 °C, P = 5 MPa, GHSV = 760 ml (g<sub>cat</sub> h)<sup>-1</sup>, syngas ratio (CO/H<sub>2</sub> = 1:1)

| Product         | Selectivity (with CO <sub>2</sub> ), % |                           |                             |                |
|-----------------|----------------------------------------|---------------------------|-----------------------------|----------------|
|                 | KCMS-org.CVD                           | KCMS-org.H <sub>2</sub> S | KCMS-Inorg.H <sub>2</sub> S | KCMS-Inorg.CVD |
| CO <sub>2</sub> | 61                                     | 18                        | 21                          | 13             |
| C1              | 0                                      | 5                         | 1                           | 2              |
| C2              | 2                                      | 3                         | 8                           | 1              |
| C3              | 4                                      | 0                         | 5                           | 0              |
| C4              | 5                                      | 0                         | 2                           | 1              |
| MeOH            | 7                                      | 12                        | 32                          | 10             |
| PrOH-2          | 0                                      | 0                         | 0                           | 0              |
| EtOH            | 14                                     | 29                        | 19                          | 71             |
| BuOH-2          | 0                                      | 0                         | 0                           | 0              |
| PrOH-1          | 2                                      | 19                        | 5                           | 1              |
| i-BuOH          | 4                                      | 5                         | 6                           | 0              |
| BuOH-1          | 0                                      | 6                         | 1                           | 0              |
| i-AmOH          | 0                                      | 2                         | 0                           | 0              |
| AmOH-1          | 0                                      | 2                         | 0                           | 0              |

In terms of morphological evaluation, a comprehensive analysis of the slab structure can be achieved provided there is adequate contrast, which is often attainable with model catalysts like metal sulfides supported on carbon substrates [1–2]. *Baubet et al.* [3] conducted an in-depth investigation into the size and shape of alumina-supported Co-Mo sulfide structures. However, their study utilized catalysts with low metal loading and relatively high sulfidation temperatures (reaching up to 800°C), resulting in the formation of larger, well-separated slab structures (up to 10 nm) that were easier to characterize. The catalysts synthesized in our study via chemical vapor deposition (CVD) exhibit a Mo loading similar to those reported by Baubet et al. [3], but they display significantly larger visible particles. When compared to CVD-prepared catalysts, those synthesized using H<sub>2</sub>S exhibit fewer distinct CoS<sub>x</sub> crystals or Co-rich particles. In the case of the H<sub>2</sub>S preparation method, the absence of organic additives in catalysts derived from inorganic precursors (KCMS-Inorg.H<sub>2</sub>S) may enhance the interaction between the active metals and the support. This stronger interaction reduces the extent of sulfidation and contributes to the formation of smaller MoS<sub>2</sub> structures [4]. Additionally, it is important to note that indistinct projections of MoS<sub>2</sub> crystallites are often attributed to the reoxidation of MoS<sub>2</sub> [5–6].



## References

1. Carlsson A., Brorson M., Topsøe H. Morphology of WS<sub>2</sub> nanoclusters in WS<sub>2</sub>/C hydrodesulfurization catalysts revealed by high-angle annular dark-field scanning transmission electron microscopy (HAADF-STEM) imaging, *J. Catal.* 2004, 227, 530–536.
2. Brorson M., Carlsson A., Topsøe H. The morphology of MoS<sub>2</sub>, WS<sub>2</sub>, Co-Mo-S, Ni-Mo-S and Ni-W-S nanoclusters in hydrodesulfurization catalysts revealed by HAADF-STEM, *Catal. Today*. 2007, 123, 31–36.
3. Baubet B., Girleanu M., Gay A.S., Taleb A.L., Moreaud M., Wahl F., Delattre V., Devers E., Hugon A., Ersen O., Afanasiev P., Raybaud P. Quantitative Twodimensional (2D) morphology-selectivity relationship of CoMoS nanolayers: A combined high-resolution high-angle annular dark field scanning transmission electron microscopy (HR HAADF-STEM) and density functional theory (DFT) Study. *ACS Catal.* 2016, 6, 1081–1092.
4. Eijssbouts S. On the flexibility of the active phase in hydrotreating catalysts, *Appl. Catal. A Gen.* 1997, 158, 53–92.
5. Bremmer G.M., Haandel L. V., Hensen E.J.M., Frenken J.W.M., Kooyman P.J. The effect of oxidation and resulfidation on (Ni/Co)MoS<sub>2</sub> hydrodesulfurisation catalysts. *Appl. Catal. B Environ.* 2019, 243, 145–150.
6. Hallie H. Experience reveals best presulfiding techniques for HDS and HDN catalysts, *Oil Gas J.* 1982, 80, 69–74.
